# Supplementary material
Source: PubMed Central journal article supplement (PMC6364135)
Supplement: 780340_Supplemental_Table_1.pdf [file 780340_Supplemental_Table_1.pdf]

Supplementary Table 1: Confidence intervals of the differences

a) BDI response

| Group | Difference | Time Point | Estimate | Lower_95CI | Upper_95CI |
|-------|------------|------------|----------|------------|------------|
| PREF  | CBT-PAT    | 1 year     | -3.82    | -8.09      | 0.45       |
| PREF  | CBT-PAT    | 3 years    | -0.14    | -4.76      | 4.49       |
| RAND  | CBT-PAT    | 1 year     | -0.73    | -5.85      | 4.38       |
| RAND  | CBT-PAT    | 3 years    | 0.53     | -5.00      | 6.05       |
| PAT   | RAND-PREF  | 1 year     | -1.72    | -6.02      | 2.57       |
| PAT   | RAND-PREF  | 3 years    | -2.49    | -5.98      | 1.01       |
| CBT   | RAND-PREF  | 1 year     | 1.37     | -3.74      | 6.48       |
| CBT   | RAND-PREF  | 3 years    | -2.41    | -7.87      | 3.05       |

b) QIDS-C response

| Group | Difference | Time    | Estimate | Lower_95CI | Upper_95CI |
|-------|------------|---------|----------|------------|------------|
| PREF  | CBT-PAT    | 1 year  | -1.91    | -3.64      | -0.18      |
| PREF  | CBT-PAT    | 3 years | 0.99     | -0.83      | 2.81       |
| RAND  | CBT-PAT    | 1 year  | -0.84    | -2.95      | 1.28       |
| RAND  | CBT-PAT    | 3 years | -0.58    | -2.84      | 1.69       |
| PAT   | RAND-PREF  | 1 year  | -0.49    | -2.27      | 1.30       |
| PAT   | RAND-PREF  | 3 years | -1.30    | -2.74      | 0.14       |
| CBT   | RAND-PREF  | 1 year  | 0.59     | -1.47      | 2.65       |
| CBT   | RAND-PREF  | 3 years | -3.18    | -5.33      | -1.03      |

Presented are the confidence intervals of the differences in the four treatment arms.  
 PREF=preference; RAND= randomization arm; 95CI= 95% confidence interval.
