# Supplementary material
Source: PubMed Central journal article supplement (PMC6364135)
Supplement: 780340_Supplemental_Table_2.pdf [file 780340_Supplemental_Table_2.pdf]

Supplementary Table 2: Sensitivity analyses: Last Available Imputation

| BDI              | Estimate | Std. Error | t value |      | QIDS-C           | Estimate | Std. Error | t value |      |
|------------------|----------|------------|---------|------|------------------|----------|------------|---------|------|
| Intercept        | 20,83    | 0,90       | 23,23   | -    | Intercept        | 8,52     | 0,37       | 22,93   | -    |
| Baseline Score   | 0,68     | 0,08       | 8,06    | ***  | Baseline Score   | 0,73     | 0,09       | 7,82    | ***  |
| 1 year           | 2,28     | 0,34       | 6,73    |      | 1 year           | 1,17     | 0,17       | 6,73    |      |
| 2 years          | 0,04     | 0,34       | 0,13    | ***  | 2 years          | -0,11    | 0,17       | -0,63   | ***  |
| 3 years          | -2,32    | 0,34       | -6,87   |      | 3 years          | -1,06    | 0,17       | -6,10   |      |
| PREF CBT         | 1,32     | 1,17       | 1,12    |      | PREF CBT         | 0,81     | 0,49       | 1,67    |      |
| PREF PAT         | 1,18     | 1,04       | 1,14    |      | PREF PAT         | 0,78     | 0,43       | 1,83    |      |
| RAND CBT         | -1,10    | 1,37       | -0,81   | N.S. | RAND CBT         | -0,67    | 0,57       | -1,16   | N.S. |
| RAND PAT         | -1,39    | 1,30       | -1,07   |      | RAND PAT         | -0,93    | 0,54       | -1,71   |      |
| No Med. T0       | -2,06    | 1,02       | -2,01   |      | No Med. T0       | -1,20    | 0,43       | -2,82   |      |
| Med. T0          | 1,89     | 1,05       | 1,79    | -    | Med. T0          | 0,24     | 0,44       | 0,54    | -    |
| Missing Med. T0  | 0,17     | 1,51       | 0,11    |      | MissingMed. T0   | 0,96     | 0,63       | 1,54    |      |
| PREF CBT 1 year  | -0,68    | 0,56       | -1,20   |      | PREF CBT 1 year  | -0,55    | 0,29       | -1,90   |      |
| PREF PAT 1 year  | -0,04    | 0,49       | -0,09   |      | PREF PAT 1 year  | 0,39     | 0,25       | 1,53    |      |
| RAND CBT 1 year  | -0,35    | 0,65       | -0,54   |      | RAND CBT 1 year  | -0,10    | 0,34       | -0,31   |      |
| RAND PAT 1 year  | 1,07     | 0,62       | 1,72    |      | RAND PAT 1 year  | 0,26     | 0,32       | 0,83    |      |
| PREF CBT 2 years | -0,67    | 0,56       | -1,19   |      | PREF CBT 2 years | -0,18    | 0,29       | -0,61   |      |
| PREF PAT 2 years | 0,11     | 0,49       | 0,23    | N.S. | PREF PAT 2 years | -0,11    | 0,25       | -0,43   | N.S. |
| RAND CBT 2 years | 0,64     | 0,65       | 0,98    |      | RAND CBT 2 years | 0,64     | 0,34       | 1,90    |      |
| RAND PAT 2 years | -0,08    | 0,62       | -0,13   |      | RAND PAT 2 years | -0,35    | 0,32       | -1,10   |      |
| PREF CBT 3 years | 1,35     | 0,56       | 2,39    |      | PREF CBT 3 years | 0,73     | 0,29       | 2,51    |      |
| PREF PAT 3 years | -0,07    | 0,49       | -0,14   |      | PREF PAT 3 years | -0,28    | 0,25       | -1,10   |      |
| RAND CBT 3 years | -0,29    | 0,65       | -0,44   |      | RAND CBT 3 years | -0,53    | 0,34       | -1,59   |      |
| RAND PAT 3 years | -0,99    | 0,62       | -1,59   |      | RAND PAT 3 years | 0,09     | 0,32       | 0,27    |      |

Note: N.S.  $p > 0.5$  \*  $p \leq .05$ ; \*\*  $p \leq .01$ ; \*\*\*  $p \leq .001$

*Annotation*

We performed sensitivity analyses by repeating the analysis on data in which missing BDI/QIDS-C scores were imputed based on the last available score of the respective participant ("last value carried forward"). The table shows that we achieved the same results as in our main analysis assuming data were missing at random.
