# Supplementary material
Source: PubMed Central journal article supplement (PMC6364135)
Supplement: 780340_Supplemental_Table_3.pdf [file 780340_Supplemental_Table_3.pdf]

### **Psychoanalytische Therapie**

In der psychoanalytischen Therapie wird der Einfluss untersucht, den unbewusste Wünsche und Ängste auf das bewusste Erleben und Handeln im Hier und Jetzt ausüben. Die psychoanalytische Therapie bleibt nicht, wie oft angenommen wird, bei der Aufarbeitung unbewältigter Kindheitserlebnisse stehen, sondern deckt deren unbewusste wie bewusste Wirkung im Zusammenhang mit lebensgeschichtlichen Erfahrungen auch im Hinblick auf die Zukunftsgestaltung auf. Durch die Möglichkeit in der Beziehung zum Analytiker unbewusste Beziehungsgestaltungen zu wiederholen, versucht die psychoanalytische Psychotherapie der Bedeutung wiederkehrender depressiver Verarbeitung von Lebenserfahrungen auf die Spur zu kommen. Die „Nachhaltigkeit“ psychoanalytischer Psychotherapie kann in einer „Nachentwicklung“ des eigenen Selbstwertgefühls und in der Beziehung zu nahe stehenden Menschen gesehen werden. Eine Veränderung der Symptomatik ergibt sich infolge des analytischen Prozesses, indem die bislang unzulänglichen Krankheitsursachen aufgedeckt, bearbeitet und integriert werden. Die Therapie kann mit einer Frequenz von ein- bis maximal dreimal 50 Minuten in der Woche stattfinden.

### **Kognitive Verhaltenstherapie**

Die kognitive Verhaltenstherapie zielt auf eine Veränderung des gegenwärtigen Denkens und Verhaltens ab. Die kognitive Verhaltenstherapie ist ein Anwendungsbereich der Verhaltensforschung und Lerntheorien. Im Mittelpunkt der Behandlung steht dabei die Veränderung des Verhaltens, Erlebens und Denkens durch Prozesse wie Neulernen, Umlernen und Verlernen. Therapeut und Betroffener führen zusammen eine genaue Analyse der Probleme durch, die als Lerngeschichte aus der Vergangenheit gesehen werden kann. In der Therapie werden systematisch ungünstige Verhaltensweisen und Denkmuster identifiziert und der Patient wird dazu angeleitet, hilfreiche Strategien zu entwickeln und diese schrittweise selbstständig einzusetzen, um so zu lernen die nicht optimalen Verhaltensweisen zu verändern. Die Verhaltenstherapie verfügt zur Erreichung von Veränderungen und anvisierten Lösungen, neben dem Gespräch, über eine Vielzahl von bewährten Verfahren, die zum Teil auch außerhalb der Therapiesitzung oder als Hausaufgabe im Anschluss an die Therapiesitzungen durchgeführt werden. Die Therapie findet meist mit einer Frequenz von einmal 50 Minuten in der Woche statt, kann aber je nach Behandlungsphase auch häufiger (z.B. zweimal pro Woche) oder intensiver (z.B. längere Sitzungen bis zu zwei Stunden) durchgeführt werden.
